# Supplementary material for: Application of metagenomic next-generation sequencing for bronchoalveolar lavage diagnostics in patients with lower respiratory tract infections
Source: PubMed Central journal article supplement — J Int Med Res. 2022 Apr 28;50(4):03000605221089795. doi: 10.1177/03000605221089795 (PMC9087262; doi:10.1177/03000605221089795), 2022-04-28
Supplement: sj-pdf-1-imr-10.1177_03000605221089795.pdf [file sj-pdf-1-imr-10.1177_03000605221089795.pdf]

| Patient NO | mNGS                               | Number of unique reads | Relative abundance (%) | Coverage(%) | Conventional          |                       | PCR results | Comprehensive diagnosis         | Categories    |
|------------|------------------------------------|------------------------|------------------------|-------------|-----------------------|-----------------------|-------------|---------------------------------|---------------|
|            |                                    |                        |                        |             | Smear                 | Culture               |             |                                 |               |
| 1          | Klebsiella pneumoniae              | 2931                   | 73.05                  | 6.65        | Gram-negative bacilli | Klebsiella pneumoniae | -           | Klebsiella pneumoniae pneumonia | Definite      |
| 2          | Oral Prevotella                    | 1234                   | -                      | 1.58        | Negative              | Negative              | -           | Tuberculosis                    | Definite      |
|            | Prevotella intermedia              | 490                    | -                      | 0.6874      |                       |                       |             |                                 |               |
|            | Micromonas parvum                  | 857                    | -                      | 2.89        |                       |                       |             |                                 |               |
|            | Oral Peptostreptococcus            | 751                    | -                      | 2.14        |                       |                       |             |                                 |               |
|            | Anaerobic Digestive Streptococcus  | 8                      | -                      | 0.0362      |                       |                       |             |                                 |               |
|            | Campylobacter rectum               | 390                    | -                      | 1.21        |                       |                       |             |                                 |               |
|            | Campylobacter showa                | 40                     | -                      | 0.2581      |                       |                       |             |                                 |               |
|            | difficile                          | 222                    | -                      | 0.669       |                       |                       |             |                                 |               |
|            | Gingivalis gingivalis              | 200                    | -                      | 0.6813      |                       |                       |             |                                 |               |
| B. lentus  | 174                                | -                      | 0.709                  |             |                       |                       |             |                                 |               |
| 3          | Pseudomonas fluorescens            | 33                     | 13.72                  | 0.0345      | Negative              | Negative              | -           | Bacterial pneumonia             | Probable      |
|            | Mycobacterium tuberculosis complex | 11                     | 4.07                   | -           |                       |                       |             | Tuberculosis                    | Definite      |
| 4          | Enterococcus faecium               | 18                     | 0.14                   | 0.0308      | Negative              | Negative              | -           | Bacterial pneumonia             | +CMV Probable |
|            | CMV                                | 8312                   | 99.04                  | 57.74       |                       |                       |             |                                 |               |
|            | EBV                                | 14                     | 0.24                   | 0.9217      |                       |                       |             |                                 |               |
| 5          | Chlamydia psittaci                 | 15                     | 22.35                  | 0.0721      | Negative              | Negative              | -           | Chlamydia pneumoniae            | sp. Definite  |
|            | Actinomyces gravenis               | 5                      | 3                      | 0.0097      |                       |                       |             |                                 |               |
|            | Campylobacter rectum               | 3                      | 2.11                   | 0.0068      |                       |                       |             |                                 |               |
| 6          | Gingivalis gingivalis              | 15                     | 7.77                   | 0.0334      | Negative              | Candida albicans      | -           | Bacterial pneumonia             | Probable      |
|            | Actinomycetes of teeth             | 6                      | 1.98                   | 0.0085      |                       |                       |             |                                 |               |
|            | Campylobacter simplex              | 5                      | 3.03                   | 0.0107      |                       |                       |             |                                 |               |

|    |                                           |        |       |        |          |                      |           |                                      |          |
|----|-------------------------------------------|--------|-------|--------|----------|----------------------|-----------|--------------------------------------|----------|
|    | <i>Candida albicans</i>                   | 168    | 47.09 | 0.0305 |          |                      |           |                                      |          |
| 7  | <i>Haemophilus parainfluenzae</i>         | 14     | 2.12  | 0.0301 | Negative | Negative             | -         | Bacterial pneumonia                  | Probable |
|    | EBV                                       | 5      | 100   | 0.1005 |          |                      |           |                                      |          |
| 8  | <i>Haemophilus parainfluenzae</i>         | 20     | 4.37  | 0.0384 | Negative | Negative             | -         | Bacterial pneumonia                  | Probable |
|    | <i>Pneumocystis jirovecii</i>             | 4      | 2.98  | 0.002  |          |                      |           | PCP                                  | Definite |
| 10 | <i>Klebsiella aerogenes</i>               | 39090  | 10.45 | 30.31  | Negative | Negative             | -         | Bacterial pneumonia                  | Probable |
|    | <i>Haemophilus parainfluenzae</i>         | 5626   | 4.79  | 8.8    |          |                      |           |                                      |          |
|    | <i>Candida albicans</i>                   | 4      | 2.11  | 0.0006 |          |                      |           |                                      |          |
| 11 | <i>Actinomyces grivensis</i>              | 126270 | 18.89 | 76.98  | Negative | Negative             | -         | Actinomycete pneumonia               | Probable |
|    | <i>Actinobacteria sticky</i>              | 1381   | 18.89 | 4.52   |          |                      |           |                                      |          |
|    | <i>Megacoccus</i>                         | 10116  | 1.73  | 25.39  |          |                      |           |                                      |          |
| 12 | <i>Haemophilus parainfluenzae</i>         | 16     | 1.64  | 0.0193 | Negative | Negative             | -         | Bacterial pneumonia                  | Probable |
| 13 | <i>Tropheryma whipplei</i>                | 29     | 3.69  | 0.1343 | Negative | Actinomycetes caries | -         | <i>Tropheryma whipplei</i> pneumonia | Probable |
| 14 | <i>Haemophilus parainfluenzae</i>         | 4      | 2.52  | 0.006  | Negative | Negative             | -         | Bacterial pneumonia                  | Probable |
| 15 | <i>Mycobacterium tuberculosis complex</i> | 7      | 1.77  | -      | Negative | Negative             | TB-DNA(+) | Tuberculosis                         | Definite |
| 16 | <i>Haemophilus parainfluenzae</i>         | 159    | 1.63  | 0.2693 | Negative | Negative             | TB-DNA(+) | Bacterial pneumonia                  | Probable |
|    | <i>Mycobacterium tuberculosis complex</i> | 1      | 0     | -      |          |                      |           | Tuberculosis                         | Definite |
| 17 | <i>Actinomyces grivensis</i>              | 2778   | 1.33  | 7.22   | Negative | Negative             | -         | Bacterial pneumonia                  | Probable |
|    | Human alphaherpesvirus type 1             | 168    | 99.44 | 4.58   |          |                      |           |                                      |          |
| 18 | Inhabiting <i>Prevotella</i>              | 11673  | 21.48 | 13.72  | Negative | Negative             | -         | Bacterial pneumonia                  | Probable |
|    | <i>Timon Prevotella</i>                   | 141    | 0.49  | 0.2964 |          |                      |           |                                      |          |
|    | <i>Micromonas parvum</i>                  | 10379  | 28.9  | 25.03  |          |                      |           |                                      |          |
| 19 | <i>Klebsiella pneumoniae</i>              | 623    | 35.68 | 1.13   | Negative | Negative             | -         | Bacterial pneumonia                  | Probable |

|    |                                    |     |       |        |          |                     |           |                         |          |
|----|------------------------------------|-----|-------|--------|----------|---------------------|-----------|-------------------------|----------|
| 20 | Mycobacterium paracytogenes        | 45  | 14.02 | 0.1523 | Negative | Aspergillus fumigat | -         | Mycobacterium pneumonia | Probable |
|    | Aspergillus fumigatus              | 4   | 7.95  | 0.0016 |          |                     |           | Aspergillus pneumonia   | sp.      |
| 21 | Streptococcus constellation        | 29  | 0.82  | 0.1035 | Negative | Negative            | -         | Bacterial pneumonia     | Probable |
|    | Micromonas parvum                  | 304 | 6.25  | 0.8775 |          |                     |           |                         |          |
| 22 | Dental actinomycetes               | 243 | 0.5   | 0.415  | Negative | Negative            | -         | Bacterial pneumonia     | Probable |
|    | Actinomyces chlamydia              | 64  | 0.14  | 0.1109 |          |                     |           |                         |          |
|    | Haemophilus                        | 17  | 0.21  | 0.171  |          |                     |           |                         |          |
|    | Listeria turbidites                | 962 | 3.16  | 2.59   |          |                     |           |                         |          |
|    | EBV                                | 122 | 57.38 | 2.71   |          |                     |           |                         |          |
|    | CMV                                | 15  | 5.31  | 0.2748 |          |                     |           |                         |          |
|    | HHV-7                              | 3   | 1.66  | 0.0891 |          |                     |           |                         |          |
| 23 | Actinomyces neisseri               | 92  | 2.81  | 0.2158 | Negative | Negative            | -         | Bacterial pneumonia     | Probable |
|    | Actinomyces marseii                | 65  | 1.27  | 0.0973 |          |                     |           |                         |          |
| 24 | Actinomyces chlamydia              | 34  | 0.39  | 0.047  | Negative | Negative            | -         | Bacterial pneumonia     | Possible |
|    | Goldella denitrificans             | 47  | 1.15  | 0.1392 |          |                     |           | Tuberculosis            | Definite |
|    | skardovii                          | 24  | 0.63  | 0.0771 |          |                     |           |                         |          |
|    | Mycobacterium tuberculosis complex | 89  | 0.87  | -      |          |                     |           |                         |          |
| 25 | Actinomyces chlamydia              | 3   | 0.2   | 0.0064 | Negative | Negative            | TB-DNA(+) | Tuberculosis            | Definite |
|    | Eubacterium gingivalis             | 12  | 1.18  | 0.0371 |          |                     |           |                         |          |
|    | Mycobacterium tuberculosis complex | 70  | 2.71  | -      |          |                     |           |                         |          |
| 26 | Mycobacterium tuberculosis complex | 13  | 24.78 |        | Negative | Negative            | TB-DNA(+) | Tuberculosis            | Definite |
| 27 | Haemophilus parahaemolyticus       | 10  | 11.1  | 0.0304 | Negative | Negative            | -         | Bacterial pneumonia     | Probable |
| 28 | Acinetobacter baumannii            | 20  | 5.2   | 0.0376 | Negative | Negative            | -         | Bacterial pneumonia     | Probable |
| 29 | Negative                           | -   | -     | -      | Negative | Negative            | -         | Bacterial pneumonia     | Possible |
| 30 | Fusobacterium                      | 9   | 0.43  | 0.0516 | Negative | Negative            | Xpert(+)  | Tuberculosis            | Definite |

|     |                        |     |       |        |                       |                             |            |                                  |                    |
|-----|------------------------|-----|-------|--------|-----------------------|-----------------------------|------------|----------------------------------|--------------------|
|     | Haemophilus in sputum  | 17  | 0.4   | 0.0336 |                       |                             |            |                                  |                    |
|     | Actinobacteria dental  | 7   | 0.09  | 0.0107 |                       |                             |            |                                  |                    |
| 31  | Negative               | -   | -     | -      | Negative              | Negative                    | TB-DAN(+)  | Tuberculosis                     | Definite           |
|     | Escherichia coli       | 84  | 3.35  | 0.1497 | Negative              | Escherichia coli            | -          | Bacterial pneumonia              | Probable           |
|     | Enterococcus faecalis  | 89  | 1.79  | 0.1253 |                       | Enterococcus faecalis       |            |                                  |                    |
|     | Shigella sonnsonii     | 8   | 1.44  | 0.101  |                       | Candida albicans            |            |                                  |                    |
| 32* | Shigella dysentery     | 4   | 4.15  | 0.2016 |                       |                             |            |                                  |                    |
|     | Listeria diaphysalis   | 9   | 0.42  | 0.0297 |                       |                             |            |                                  |                    |
|     | Candida albicans       | 443 | 76.01 | 0.0788 |                       |                             |            |                                  |                    |
|     | HSV1                   | 995 | 100   | 21.25  |                       |                             |            |                                  |                    |
| 33  | EBV                    | 63  | 98.37 | 1.83   | Negative              | Negative                    | -          | Bacterial pneumonia              | Probable           |
|     | Klebsiella pneumoniae  | 60  | 74.51 | 1.43   | Negative              | Stomatococcus mucilaginosus | -          | Bacterial                        | Probable           |
| 34  |                        |     |       |        |                       | Neisseria                   |            |                                  |                    |
|     |                        |     |       |        |                       | Candida albicans            |            |                                  |                    |
| 35  | Negative               | -   | -     | -      | Negative              | Negative                    | -          | Bacterial pneumonia              | Probable           |
| 36  | HHV-7                  | 2   | 2.3   | 0.0594 | Negative              | Negative                    | -          | HHV-7 pneumonia                  | Probable           |
| 37  | Enterococcus faecium   | 1   | 1.54  | 0.0014 | Gram-negative bacilli | Negative                    | -          | Lung contusion pneumonia         | Probable           |
| 38  | Pseudomonas aeruginosa | 129 | 16.06 | 0.3854 | Gram-negative bacilli | Pseudomonas aeruginosa      | -          | Pseudomonas aeruginosa pneumonia | Definite           |
| 39  | Klebsiella pneumoniae  | -   | -     | -      | Negative              | Negative                    | Adenovirus | Adenovirus+ pneumonia            | Bacterial Probable |
|     | Chryseobacterium       | -   | -     | -      |                       |                             |            |                                  |                    |
| 40  | Klebsiella             | 3   | 2.18  |        | Negative              | Negative                    | -          | Bacterial pneumonia              | Probable           |

|     |                              |       |       |        |          |                              |   |                     |                  |
|-----|------------------------------|-------|-------|--------|----------|------------------------------|---|---------------------|------------------|
| 41  | Klebsiella pneumoniae        | 3     | 1.95  | 0.0061 | Negative | Negative                     | - | Bacterial pneumonia | Probable         |
| 42  | Enterobacter horii           | 17850 | 43.99 | 18.03  | Negative | Stenotrophomonas maltophilia | - | Bacterial pneumonia | +fungal Probable |
|     | Enterococcus faecium         | 11101 | 27.26 | 14.98  |          |                              |   |                     |                  |
|     | Stenotrophomonas maltophilia | 1132  | 3.02  | 1.75   |          |                              |   |                     |                  |
|     | Acinetobacter baumannii      | 245   | 0.69  | 0.3072 |          |                              |   |                     |                  |
|     | Aspergillus fumigatus        | 3     | 4.07  | 0.001  |          |                              |   |                     |                  |
| 43* | Pseudomonas                  | 305   | 11    | 1.23   | Negative | Stenotrophomonas maltophilia | - | Bacterial pneumonia | Probable         |
|     | Pseudomonas putida           | 171   | 9.75  | 0.8125 |          | Chryseobacterium indologenes |   |                     |                  |
|     | Hospital Acinetobacter       | 1174  | 9.03  | 1.64   |          |                              |   |                     |                  |
|     | Acinetobacter baumannii      | 452   | 5.06  | 0.7659 |          |                              |   |                     |                  |
|     | Enterobacter horii           | 1518  | 8.91  | 1.76   |          |                              |   |                     |                  |
|     | Stenotrophomonas maltophilia | 26    | 0.21  | 0.0403 |          |                              |   |                     |                  |
|     | Elizabeth bacteria           | 977   | 7.24  | 1.31   |          |                              |   |                     |                  |
|     | Aspergillus fumigatus        | 12    | 8.96  | 0.002  |          |                              |   |                     |                  |
|     | HSV-1                        | 116   | 100   | 3.1    |          |                              |   |                     |                  |
| 44* | Pyramidobacter pisco-lens    | 197   | 13.25 | 0.3425 | Negative | Negative                     | - | Bacterial           | Probable         |
|     | Actinomyces chlamydia        | 4     | 0.16  | 0.0043 |          |                              |   |                     |                  |
|     | Enterococcus faecium         | 23    | 1.32  | 0.0343 |          |                              |   |                     |                  |
|     | Acinetobacter baumannii      | 8     | 0.61  | 0.0129 |          |                              |   |                     |                  |
|     | Candida albicans             | 464   | 8.22  | 0.0792 |          |                              |   |                     |                  |
|     | parvovirus type 15           | 67    | 65.15 | 48.98  |          |                              |   |                     |                  |
|     | parvovirus type 10           | 8     | 13.09 | 11.7   |          |                              |   |                     |                  |
|     | parvovirus type 12           | 6     | 9.27  | 11.25  |          |                              |   |                     |                  |

|    |                                    |    |       |        |          |                          |   |                     |          |
|----|------------------------------------|----|-------|--------|----------|--------------------------|---|---------------------|----------|
| 45 | Tsutsugamushi                      | 42 | 71.94 | 0.0704 | Negative | Negative                 | - | Scrub typhus        | Definite |
|    | EBV                                | 4  | 100   | 0.2781 |          |                          |   |                     |          |
| 46 | Negative                           | -  | -     | -      | Negative | Staphylococcus aureus    | - | Bacterial pneumonia | Probable |
|    |                                    |    |       |        |          | Streptococcus pneumoniae |   |                     |          |
| 47 | Mycobacterium tuberculosis complex | -  | -     | -      | Negative | Negative                 | - | Tuberculosis        | Definite |

EBV: Epstein-Barr virus; HHV-7: Human herpesvirus 7; HSV1: Herpes simplex virus 1; CMV: Cytomegalovirus; TB: Tuberculosis.
