# Supplementary material for: Application of metagenomic next-generation sequencing for bronchoalveolar lavage diagnostics in patients with lower respiratory tract infections
Source: PubMed Central journal article supplement — J Int Med Res. 2022 Apr 28;50(4):03000605221089795. doi: 10.1177/03000605221089795 (PMC9087262; doi:10.1177/03000605221089795), 2022-04-28
Supplement: sj-pdf-2-imr-10.1177_03000605221089795.pdf [file sj-pdf-2-imr-10.1177_03000605221089795.pdf]

## Criteria for a Positive mNGS Result

1. Bacteria (mycobacteria excluded), virus and parasites: according to Langelier's study, mNGS identified a microbe as confirmed pathogens when the clinical testing identified the microbe too. Microbes were considered potential pathogens when literature have reported the pathogenicity or the score was as least two-fold greater than of any other microbe of the same type identified in the patient<sup>1</sup>.
2. Fungi: mNGS identified a microbe (species level) whose coverage rate scored 5-fold higher than that of any other fungus because of low absolute abundance in many samples and the contaminating fungal DNA<sup>2, 3</sup>.
3. Mycobacteria: Mycobacterium tuberculosis (MTB) was considered positive when at least 1 read was mapped to either the species or genus level due to the Mycobacteria cell wall difficult to disruption to lyse the organism for nucleic acid release and low possibility for contamination<sup>4, 5</sup>. The efficient extraction methods are critical to achieve unbiased sequencing. Nontuberculous mycobacteria (NTM) were defined as positive when the mapping read number (genus or species level) was in the top 10 in the bacteria list due to the balance of hospital-to-laboratory environmental contamination and low yield rate<sup>6, 7</sup>.

1. Langelier C, Zinter MS, Kalantar K, et al. Metagenomic Sequencing Detects Respiratory Pathogens in Hematopoietic Cellular Transplant Patients. *Am J Respir Crit Care Med* 2017;197(4): p. 524-528:
2. Bittinger K, Charlson ES, Loy E, et al. Improved characterization of medically relevant fungi in the human respiratory tract using next-generation sequencing. *Genome Biology* 2014;15:487
3. Schlager R, Chiu CY, Miller S, et al. Validation of Metagenomic Next-Generation Sequencing Tests for Universal Pathogen Detection. *Archives of Pathology & Laboratory Medicine* 2017;141:776
4. Simner PJ, Miller S, Carroll KC. Understanding the Promises and Hurdles of Metagenomic Next-Generation Sequencing as a Diagnostic Tool for Infectious Diseases. *Clinical Infectious Diseases* 2018;66:778
5. Doughty EL, Sergeant MJ, Adetifa I, et al. Culture-independent detection and characterisation of Mycobacterium tuberculosis and M. africanum in sputum samples using shotgun metagenomics on a benchtop sequencer. *PeerJ* 2014;2:e585
6. Zolpan OO, Sürücüolu S, Zkütük N, et al. Distribution of nontuberculous

mycobacteria isolated from clinical specimens and identified with DNA sequence analysis. *Mikrobiyoloji Bülteni* 2015;49:484-493

7. Ingen V, Jakko, Kohl, et al. Global outbreak of severe Mycobacterium chimaera disease after cardiac surgery: a molecular epidemiological study. *Lancet Infectious Diseases* 2017;17(10): p. 1033-1041:
